# Supplementary material
Source: ML conference proceedings conference paper supplement (https://openaccess.thecvf.com/content/ICCV_2019/html/Uy_Revisiting_Point_Cloud_ICCV_2019_paper.html)
Supplement: Supplementary file 1 [file Uy_Revisiting_Point_Cloud_ICCV_2019_supplemental.pdf]

Archive with 1 entries (1 files):
- supplementary_compressed.pdf
